# Supplementary material
Source: PubMed Central journal article supplement (PMC4757817)
Supplement: NIHMS748959-supplement.pdf [file NIHMS748959-supplement.pdf]

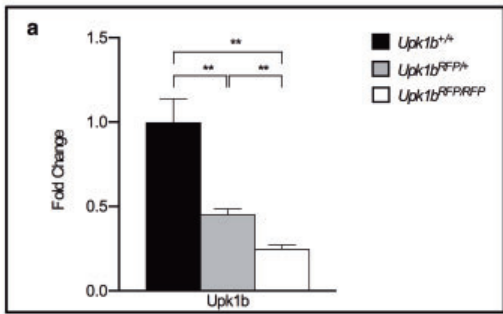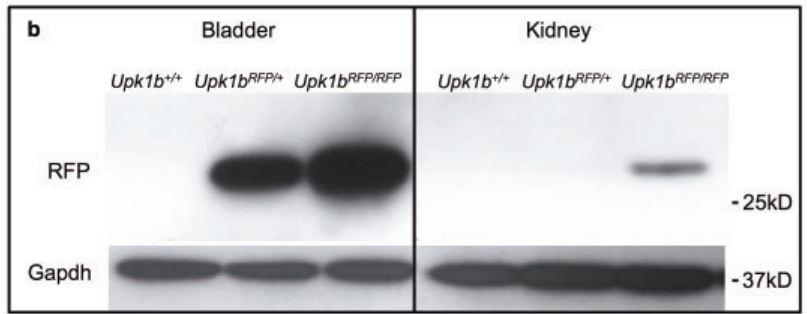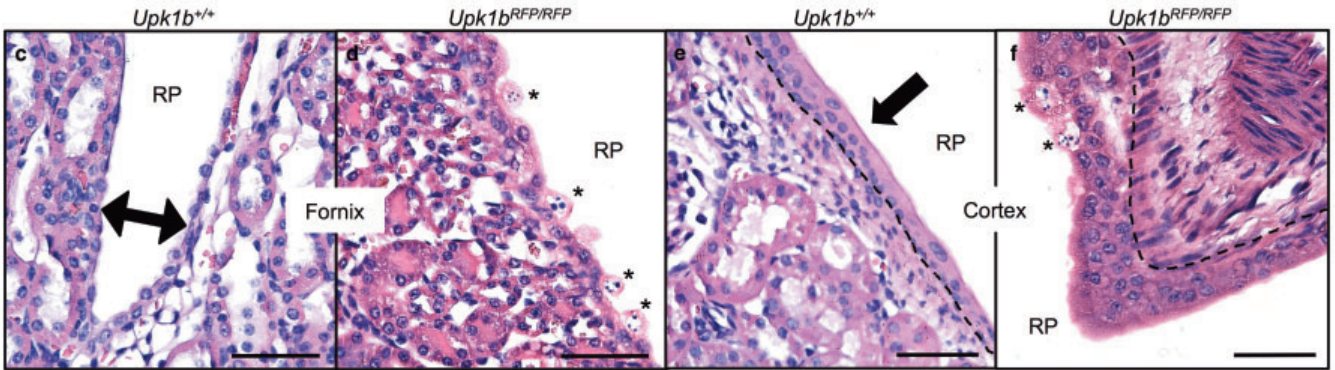

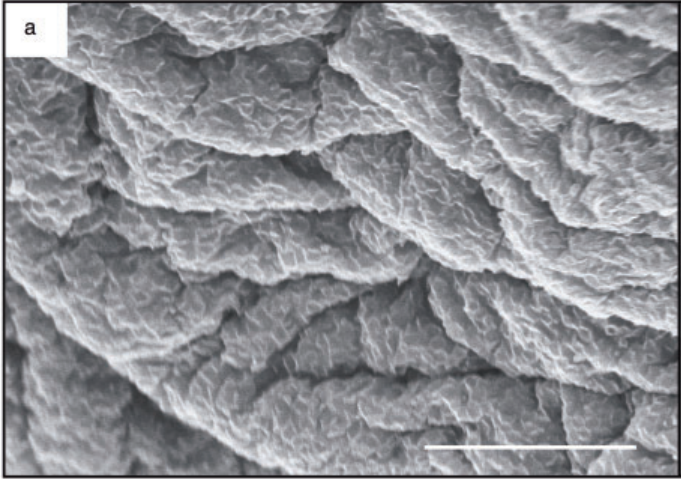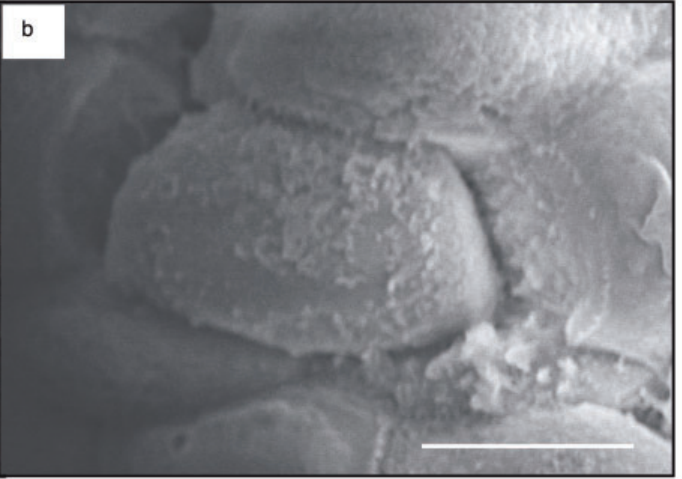

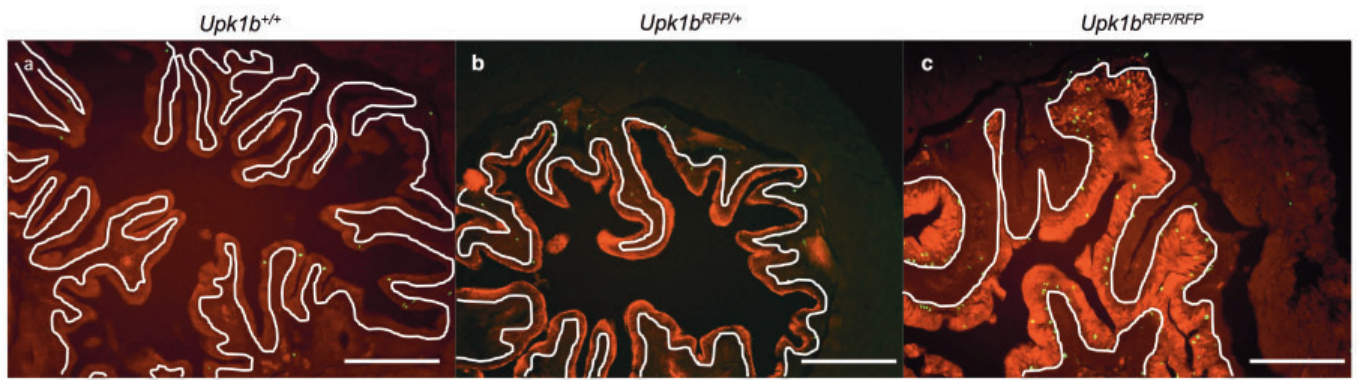

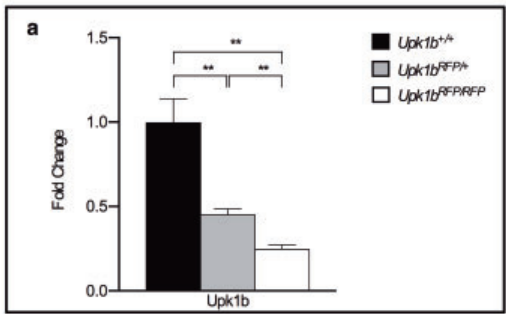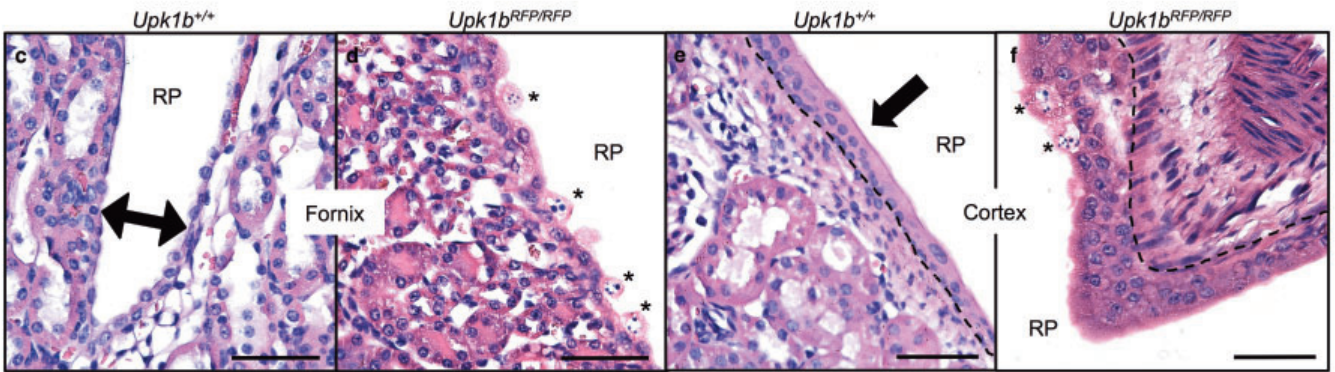

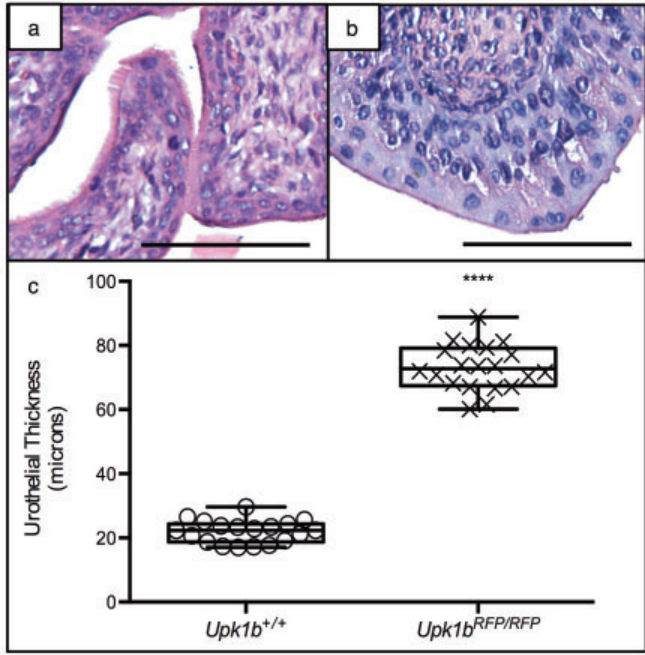

## SUPPLEMENTAL FIGURE LEGENDS

### **Supplemental Figure 1. *Upk1b*<sup>RFP/RFP</sup> Bladders Exhibit Altered Urothelial Morphology.**

(A-C) RFP expression in *Upk1b*<sup>+/+</sup>, *Upk1b*<sup>RFP/+</sup>, and *Upk1b*<sup>RFP/RFP</sup> bladders was analyzed by fluorescence imaging (D) *Upk1b* mRNA expression in *Upk1b*<sup>+/+</sup>, *Upk1b*<sup>RFP/+</sup> and *Upk1b*<sup>RFP/RFP</sup> bladders ( $n=3$ ) was analyzed by qPCR. A One-Way ANOVA and Tukey's multiple comparison post-hoc test were used to evaluate statistical significance. \*\*\*\* $p < 0.0001$ . Error bars represent standard error. (E) RFP and Gapdh expression in *Upk1b*<sup>+/+</sup>, *Upk1b*<sup>RFP/+</sup> and *Upk1b*<sup>RFP/RFP</sup> bladders was analyzed by immunoblotting. (F-H) Urothelial morphology in *Upk1b*<sup>+/+</sup>, *Upk1b*<sup>RFP/+</sup>, and *Upk1b*<sup>RFP/RFP</sup> bladders was evaluated by H&E staining. L: Bladder Lumen, Dotted White Line: Apical Urothelial Surface, Solid White and Solid Black Lines: Basement Membrane, V: Vacuole, Black Arrow: Umbrella Cell, White Arrow: Abnormal Superficial Cell. Scale bars indicate 62.5 $\mu$ m (A-C) and 100 $\mu$ m (F-H)

### **Supplemental Figure 2. Scanning Electron Microscopy Confirms Absence of the Urothelial Plaque**

(A) Scanning electron micrographs demonstrate ultrastructural analysis of the apical surface of the urothelial superficial cells in *Upk1b*<sup>+/+</sup> (A) and *Upk1b*<sup>RFP/RFP</sup> (B) bladder. Scale bars indicate 15 $\mu$ m (A, B).

**Supplemental Figure 3. Absent *Upk1b* and Urothelial Plaque Increase Urothelial Renewal.**

(A-C) Urothelial proliferation in *Upk1b*<sup>+/+</sup>, *Upk1b*<sup>RFP/+</sup> and *Upk1b*<sup>RFP/RFP</sup> bladders was analyzed by EdU incorporation and detection (green cells). Solid white line indicates basement membrane. Scale bar indicates 250µm.

**Supplemental Figure 4. *Upk1b*<sup>RFP/RFP</sup> Kidneys Exhibit Altered Urothelial Morphology.**

(A) *Upk1b* mRNA expression in *Upk1b*<sup>+/+</sup>, *Upk1b*<sup>RFP/+</sup> and *Upk1b*<sup>RFP/RFP</sup> kidneys (*n*=3) was analyzed by qPCR. A One-Way ANOVA and Tukey's multiple comparison post-hoc test were used to evaluate statistical significance. \*\**p* < 0.01. Error bars represent standard error. (B) RFP and *Gapdh* expression in *Upk1b*<sup>+/+</sup>, *Upk1b*<sup>RFP/+</sup> and *Upk1b*<sup>RFP/RFP</sup> bladders and kidneys was analyzed by immunoblotting. (C-F) Renal urothelial morphology in *Upk1b*<sup>+/+</sup> and *Upk1b*<sup>RFP/RFP</sup> fornix and cortex was evaluated by H&E staining. RP: Renal Pelvis, Double Sided Arrow: Single Cell Layer Medullary Urothelium/Renal Fornix, Asterisk: Apoptotic Bodies, Black Arrow: Multiple Urothelial Cell Layer Cortical Urothelium, Dotted Black Line: Urothelial Basement Membrane. Scale bars indicate 50µm (C-F).

**Supplemental Figure 5. Altered Urothelial Morphology is Evident Prior to the Onset of Hydronephrosis.**

(A, B) *Upk1b*<sup>RFP/RFP</sup>, but not *Upk1b*<sup>+/+</sup>, bladder urothelium is thickened prior to the onset of hydronephrosis. (C) A box and whiskers plot displays the average urothelial thickness (microns) per section in *Upk1b*<sup>+/+</sup> and *Upk1b*<sup>RFP/RFP</sup> bladders (*n*=4). Whiskers represent the minimum and maximum. An unpaired, one-tailed t test was used to calculate the p-value. \*\*\*\**p* < 0.0001. Scale bars indicate 100μm (A, B).
